# Supplementary material
Source: MDPI journal article supplement (https://www.mdpi.com/2073-4441/9/7/470)
Supplement: s1 [file s1]

# Supplementary Materials: Evaluation of Power Ultrasonic Effects on Algae Cells at a Small Pilot Scale

Xiaoge Wu and Timothy J. Mason

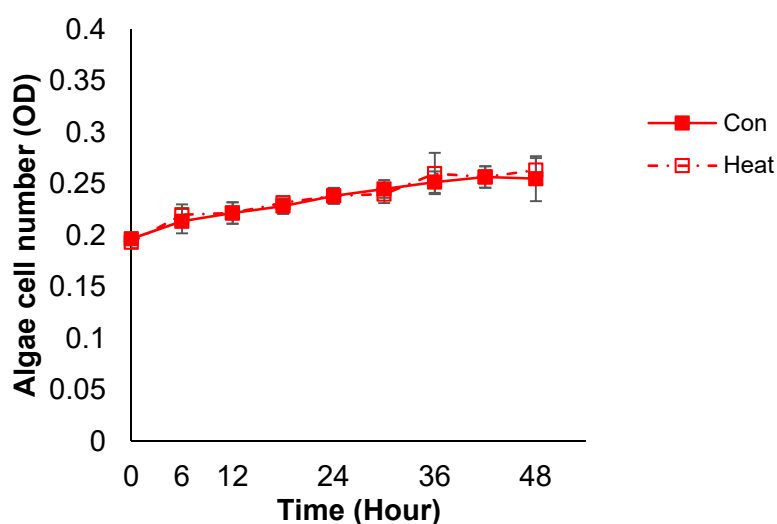

**Figure S1.** Heat of 1 L of *Microcystis aeruginosa* suspension at 30 °C for 15 minutes and culture for 48 hours (OD = optical density at 680 nm).

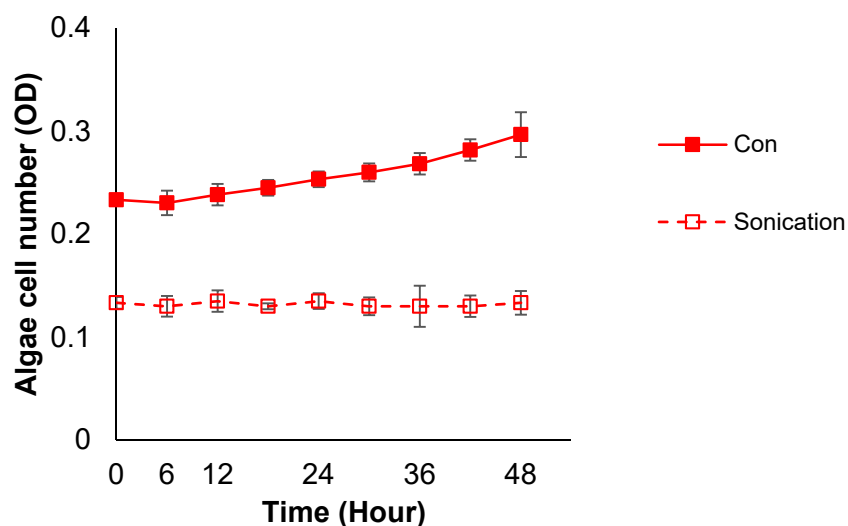

**Figure S2.** Resistance test on *Microcystis aeruginosa* for 48 hours (OD = optical density at 680 nm).

**Table S1.** Review of conventional removal methods on *Microcystis* cells.

| Method            |                               | Dose & Period                         | % Cell Remaining | Ref.             |
|-------------------|-------------------------------|---------------------------------------|------------------|------------------|
| Chemical strategy | CuSO <sub>4</sub>             | 1.5 µM/96 h                           | 39.2             | [1]              |
|                   | H <sub>2</sub> O <sub>2</sub> | 100 µM/72 h                           | 6.6              | [1]              |
|                   | Chlorine                      | 5 mg/L/60 min                         | ~97              | [2]              |
| AOP strategy      | UV                            | 0.5 W/mL/120 s                        | ~100%            | [3]              |
|                   | Ozone                         | 6 mg/L/5 min                          | ~98              | [2]              |
|                   | <b>DFR</b>                    | <b>0.0256 W/cm<sup>3</sup>/10 min</b> | <b>39.17</b>     | <b>This work</b> |

## References

1. Qian, H.; Yu, S.; Sun, Z.; Xie, X.; Liu, W.; Fu, Z. Effects of copper sulfate, hydrogen peroxide and N-phenyl-2-naphthylamine on oxidative stress and the expression of genes involved photosynthesis and microcystin disposition in *Microcystis aeruginosa*. *Aquat. Toxicol.* **2010**, *99*, 405–412.
2. Fan, J.; Ho, L.; Hobson, P.; Brookes, J. Evaluating the effectiveness of copper sulphate, chlorine, potassium permanganate, hydrogen peroxide and ozone on cyanobacterial cell integrity. *Water Res.* **2013**, *47*, 5153–5164.
3. Wang, B.; Wang, X.; Hu, Y.; Chang, M.; Bi, Y.; Hu, Z. The combined effects of UV-C radiation and H<sub>2</sub>O<sub>2</sub> on *microcystis aeruginosa*, a bloom-forming cyanobacterium. *Chemosphere* **2015**, *141*, 34–43.

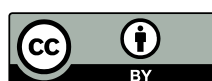

© 2017 by the authors. Licensee MDPI, Basel, Switzerland. This article is an open access article distributed under the terms and conditions of the Creative Commons Attribution (CC BY) license (<http://creativecommons.org/licenses/by/4.0/>).
